# Supplementary material
Source: PubMed Central journal article supplement (PMC2929711)
Supplement: JCI40034sd.pdf [file JCI40034sd.pdf]

## SUPPLEMENTARY METHODS

**Immunocytochemistry.** Polymorphonuclear neutrophils (PMNs) were isolated from peripheral blood of donors by sedimentation of red blood cells in Plasmagel (ZeptoMetrix), followed by Ficoll-Hypaque density gradient centrifugation (Sigma). PMNs were cytocentrifuged on glass slides and treated with cytoskeletal buffer (CSK:100mM NaCl; 300mM sucrose; 3mM MgCl<sub>2</sub>; 10mM PIPES, pH 6.8) for 30 seconds; CSK, 0.5% Triton X-100 for 30 seconds; and CSK for 30 seconds. After CSK treatment, PMNs were fixed with 4% paraformaldehyde/PBS. Slides were incubated in blocking buffer (PBS, 5% heat inactivated goat serum, 0.2% Tween, 0.2% Fish gelatin (Sigma G-7765)) at 37°C for 30 minutes. Slides were incubated with primary antibodies, rabbit anti-H3K27me<sub>2,3</sub><sup>1,2</sup> or rabbit anti-H3K9me<sub>2</sub> antibody (Upstate), and followed by secondary antibody, FITC-goat anti-rabbit IgG (Molecular Probes). Coverslips were mounted with Vectashield (Vector Laboratories, Inc.) containing DAPI to stain nuclei. Cells were viewed with 100x oil objective using Lieca DMLB upright microscope (Lieca Microsystems Wetzlar GMBH). Images were captured with SPOT RT Slider Camera and SPOT Software version 4.5 (Diagnostic Instruments Inc.). The 8-bit grayscale images were pseudo-colored with Software version 4.5. Adobe Photoshop version 7.0.1 was used to adjust the dynamic range of pseudo-colored images to the same values and to merge images.

**Methyl Specific PCR.** Briefly, 500ng genomic DNA that was digested with EcoRI was bisulfite-modified using EZ DNA Methylation-Gold assay (D5005, Zymo Research). Bisulfite-modified DNA was used as a template for PCR with PR3 primers designed for methyl specific PCR with Methyl Primer Express v1.0 (Applied Biosystems), and listed in Supplementary Table 4. PCR conditions with primers specific for methylated DNA were as follows: 95°C 5 min, 40 cycles of 94°C for 30 s, 58°C for 1 min, and 72°C for 1 min, final extension at 72°C for 7 min. PCR conditions with primers specific for unmethylated DNA were as follows: 95°C 5 min, 40 cycles of 94°C for 30 s, 53°C for 1 min, and 72°C for 1 min, final extension at 72°C for 7 min. NIH ImageJ 1.30v was used to quantitate the mean gray scale intensities corresponding to each PR3 PCR product, corrected by subtracting background gray scale values for each lane. The percentage of unmethylated DNA was calculated by dividing corrected mean intensity values for unmethylated product by the sum of the corrected mean intensity for methylated and unmethylated product. The percentage of unmethylated PR3 DNA is listed in Supplementary Figure 5 legend.

**DNA methylation.** DNA methylation at the *PR3*, *MPO* and *RUNX3* was determined using the SA Biosciences Methyl-Profiler™ DNA Methylation assay (MEA-03). Briefly, 50-100 ng of purified DNA from total leukocytes was used in a mock restriction enzyme digest, DNA methylation sensitive restriction enzyme digest, DNA methylation dependent restriction enzyme digest, and double digest. After an overnight incubation at 37°C, the DNA was analyzed by real-time PCR. Ct values were used to determine the relative DNA methylation levels. The

amount of starting DNA is proportional to the raw Ct value that results from the real-time PCR of the mock digested DNA. The amount of DNA that is resistant to digestion is determined from the Ct value from the real-time PCR of the double digest,  $Ct_{Mds}$ . All samples had a  $\Delta Ct$  ( $Ct_{\text{double}}$ ,  $Ct_{Mds} - Ct_{\text{mock}}$ ,  $Ct_{Mo}$ ) corresponding to greater than 95% complete digestion. The amount of hypermethylated DNA is calculated from the Ct value from the real-time PCR reaction of the DNA digested with methylation sensitive restriction enzyme mix,  $Ct_{Ms}$ , i.e. if the DNA is hypermethylated then the DNA is resistant to the methylation sensitive restriction enzyme and available for PCR. The amount of unmethylated DNA is calculated from the Ct value from the real-time PCR reaction of the DNA digested with methylation dependent restriction enzyme mix,  $Ct_{Md}$ , i.e. if the DNA is unmethylated then the DNA is resistant to digestion with the methylation dependent restriction enzyme and available for PCR. Intermediately methylated DNA exists when the sum of the hypermethylated and unmethylated DNA is less than 100%, and likely represents a mixture of DNA molecules with methylation at different CpG dinucleotides. Intermediately methylated DNA is detected when the  $\Delta Ct$  ( $Ct_{Ms} - Ct_{Mo}$ ) and  $\Delta Ct$  ( $Ct_{Md} - Ct_{Mo}$ ) are both greater than 1. This situation reflects the condition where some of the molecules are digested by the methylation sensitive restriction enzyme and some of the molecules are digested by the methylation dependent restriction enzyme. Since the DNA is not completely resistant to either enzyme the sample is defined as containing intermediately methylated DNA. This is distinct from samples where a fraction of the DNA molecules are unmethylated and the remaining fraction is hypermethylated, or the reciprocal. In this case either the  $\Delta Ct$  ( $Ct_{Ms} - Ct_{Mo}$ ) or the  $\Delta Ct$  ( $Ct_{Md} - Ct_{Mo}$ ) would be less than 1. For instance, if less than 50% of the molecules were unmethylated, then less than half of the DNA molecules would be digested with the methylation sensitive restriction enzyme and more than half of the original DNA molecules would be available as templates for PCR. Less than two fold difference in starting template would result in a  $\Delta Ct$  ( $Ct_{Ms} - Ct_{Mo}$ ) of less than 1.

The data in Table 1 is presented as the mean  $\pm$  standard deviation of the percentage methylated (hypermethylated plus intermediately methylated) and unmethylated DNA. The methylation status at the CpG islands examined in *PR3* and *MPO* was fully described by hypermethylated and unmethylated categories. The methylation status at *RUNX3* also contained intermediately methylated DNA at the *RUNX3* CpG island, and is reported as the sum of hypermethylated and intermediately methylated DNA in Table 1. The density of CpG dinucleotides in the *RUNX3* promoter is greater than the density of CpG dinucleotides in amplicons interrogated at *PR3* and *MPO*. Transcriptional repression mediated by DNA methylation of *RUNX3* may occur with methylation at a fraction of the CpG dinucleotides at the *RUNX3* promoter, resulting in a mixture of DNA molecules with methylation at different CpG dinucleotides, i.e. intermediately methylated DNA. It remains to be determined if an intermediate level of DNA methylation at the *RUNX3* promoter is sufficient for transcriptional repression; however, the level of unmethylated DNA at the *RUNX3* promoter, which is determined directly with the Methyl-Profiler<sup>TM</sup> DNA Methylation assay, is elevated

in healthy controls compared to ANCA patients. In Supplementary Figure 4b the average percentages of the three DNA methylation categories are shown for *RUNX3*.

## REFERENCES

1. Hamer, K.M. et al. A panel of monoclonal antibodies against human polycomb group proteins. *Hybrid Hybridomics* **21**, 245-52 (2002).
2. Montgomery, N.D. et al. The murine polycomb group protein Eed is required for global histone H3 lysine-27 methylation. *Curr Biol* **15**, 942-7 (2005).

## SUPPLEMENTARY FIGURE LEGENDS

**Supplementary Figure 1.** Histone methylation marks, H3K27me<sub>2,3</sub> and H3K9me<sub>2</sub>, are present in neutrophils from ANCA vasculitis patients. (a-f) Top six panels show neutrophils from a healthy control (panel a-c) and an ANCA vasculitis patient (panel d-f) stained with anti-H3K27me<sub>2,3</sub> antibody. Merged images of dapi stained nuclei (a,d) and immunofluorescence (b,e) are shown in c and f. (g-l) Bottom six panels show neutrophils from a healthy control (panel g-i) and an ANCA vasculitis patient (panel j-l) stained with anti-H3K9me<sub>2</sub> antibody. Merged images of dapi stained nuclei (g,j) and immunofluorescence (h,k) are shown in i and l.

**Supplementary Figure 2.** Methylation of histone H3K9 is not different at PR3 and MPO between ANCA vasculitis patients and healthy controls. (a-b) Quantitative ChIP analysis for H3K9me<sub>2</sub> enrichment on chromatin isolated from neutrophils of healthy controls (open circles, n=23) and ANCA vasculitis patients (filled diamonds, n=15) is shown for genomic regions of PR3 (a) and MPO (b). Levels of H3K9me<sub>2</sub> immunoprecipitated chromatin are reported as a percent of input DNA.

**Supplementary Figure 3.** Stratified PR3, MPO, JMJD3, and RUNX3 relative mRNA levels. Relative mRNA levels for PR3 (a), MPO (b), JMJD3 (c), and RUNX3 (d) are shown for healthy controls (blue diamonds, n=49) ANCA patients in remission (yellow diamonds, n=30), and active ANCA patients (red diamonds, n=67). Patients were separated into remission or active based on BVAS score. ANCA patients with a BVAS ≤ 1 were classified as remission; ANCA patients with a BVAS >1 were classified as active. Mean and median values for relative mRNA expression of PR3, MPO, JMJD3 and RUNX3 are listed for each class beneath the charts. P-values of two-tailed ttests between healthy controls and all ANCA patients (\*) and healthy controls and ANCA patients with active disease (#) are listed above each chart.

**Supplementary Figure 4.** DNA methylation analysis. (a) Methyl specific PCR analysis of PR3 (CpG island at Chr 19:843469-844085, Bld37). Top panel is an ethidium bromide stained 2% agarose gel with samples from PCR that used primers specific to methylated DNA following bisulfite conversion of genomic DNA. The 134bp PCR product is specific for DNA methylation at PR3. Bottom panel is an ethidium stained 2% agarose gel with samples from PCR that used primers specific to unmethylated DNA following bisulfite conversion of genomic DNA. The unmethylated status of PR3 is indicated by a 137bp PCR product. Lanes 1 and 2 are controls for methylated DNA (lane 1, U937 bisulfite modified genomic DNA) and unmethylated DNA (lane 2, THP-1 bisulfite modified genomic DNA). Lane 3 is no template control (NTC). Lanes 5-8 are PCR samples of bisulfite converted genomic DNA from healthy controls. Lanes 9-12 are PCR samples of bisulfite converted genomic DNA from ANCA patients. NIH ImageJ was used to quantitate the mean gray scale intensity for the methylated and

unmethylated specific PCR products and values used to calculate percentage of methylated and unmethylated *PR3* DNA (see Supplementary Methods). The mean unmethylated DNA at *PR3* among 4 healthy controls is  $92.6 \pm 3.1\%$  and the mean unmethylated DNA at *PR3* among 4 ANCA patients is  $91.7 \pm 1.9\%$ . A two-tailed ttest ( $P=0.64$ ) indicates percentage of unmethylated DNA at *PR3* is not significantly different between healthy controls and ANCA patients. (b) Graphical representation of the mean DNA methylation states (unmethylated; UM, hypermethylated; HM, intermediately methylated; IM) at *PR3*, *MPO*, *RUNX3* measured using methylation sensitive and dependent restriction enzymes followed by quantitative real-time PCR. For both *PR3* and *MPO* the methylation status was fully described by unmethylated and hypermethylated categories. The methylation status at *RUNX3* also contained intermediately methylated DNA. In ANCA patients  $76.9 \pm 16.2\%$  of the *RUNX3* CpG island examined is hypermethylated,  $14.2 \pm 18.0\%$  is intermediately methylated, and  $8.9 \pm 8.8\%$  is unmethylated. In healthy controls  $59.5 \pm 13.2\%$  of the *RUNX3* CpG island is hypermethylated,  $15.0 \pm 21.5\%$  is intermediately methylated, and  $25.5 \pm 14.7\%$  is unmethylated. The  $P$  values of two-tailed ttests between ANCA patients and healthy controls for hypermethylated, intermediately methylated and unmethylated are 0.095, 0.94, and 0.032, respectively.

**Supplementary Figure 5.** Standard curve for mouse *Mpo* mRNA levels. Real time PCR was used to calculate  $\Delta C_t$  values for mouse *Mpo* mRNA from serial dilutions of mouse *Mpo* positive cells (WEHI).  $\Delta C_t$  values were determined for undiluted (1) WEHI cells, 1:10 dilution (0.1) of WEHI cells with mouse *Mpo* negative cells (mouse embryonic stem cells), 1:100 dilution (0.01), and 1:1000 dilution (0.001), represented by red diamonds. The relative level of mouse *Mpo* mRNA in leukocytes was calculated using the following equation:  $y = -1.3958 \ln(x) + 2.1435$ . The  $\Delta C_t$  values for *Mpo* mRNA from leukocytes of C57Bl/6 and 129 without anti-MPO antibody, and 129 after anti-MPO antibody are represented by large black diamond, gray diamond and white diamond, respectively.

# Supplementary Figure 1

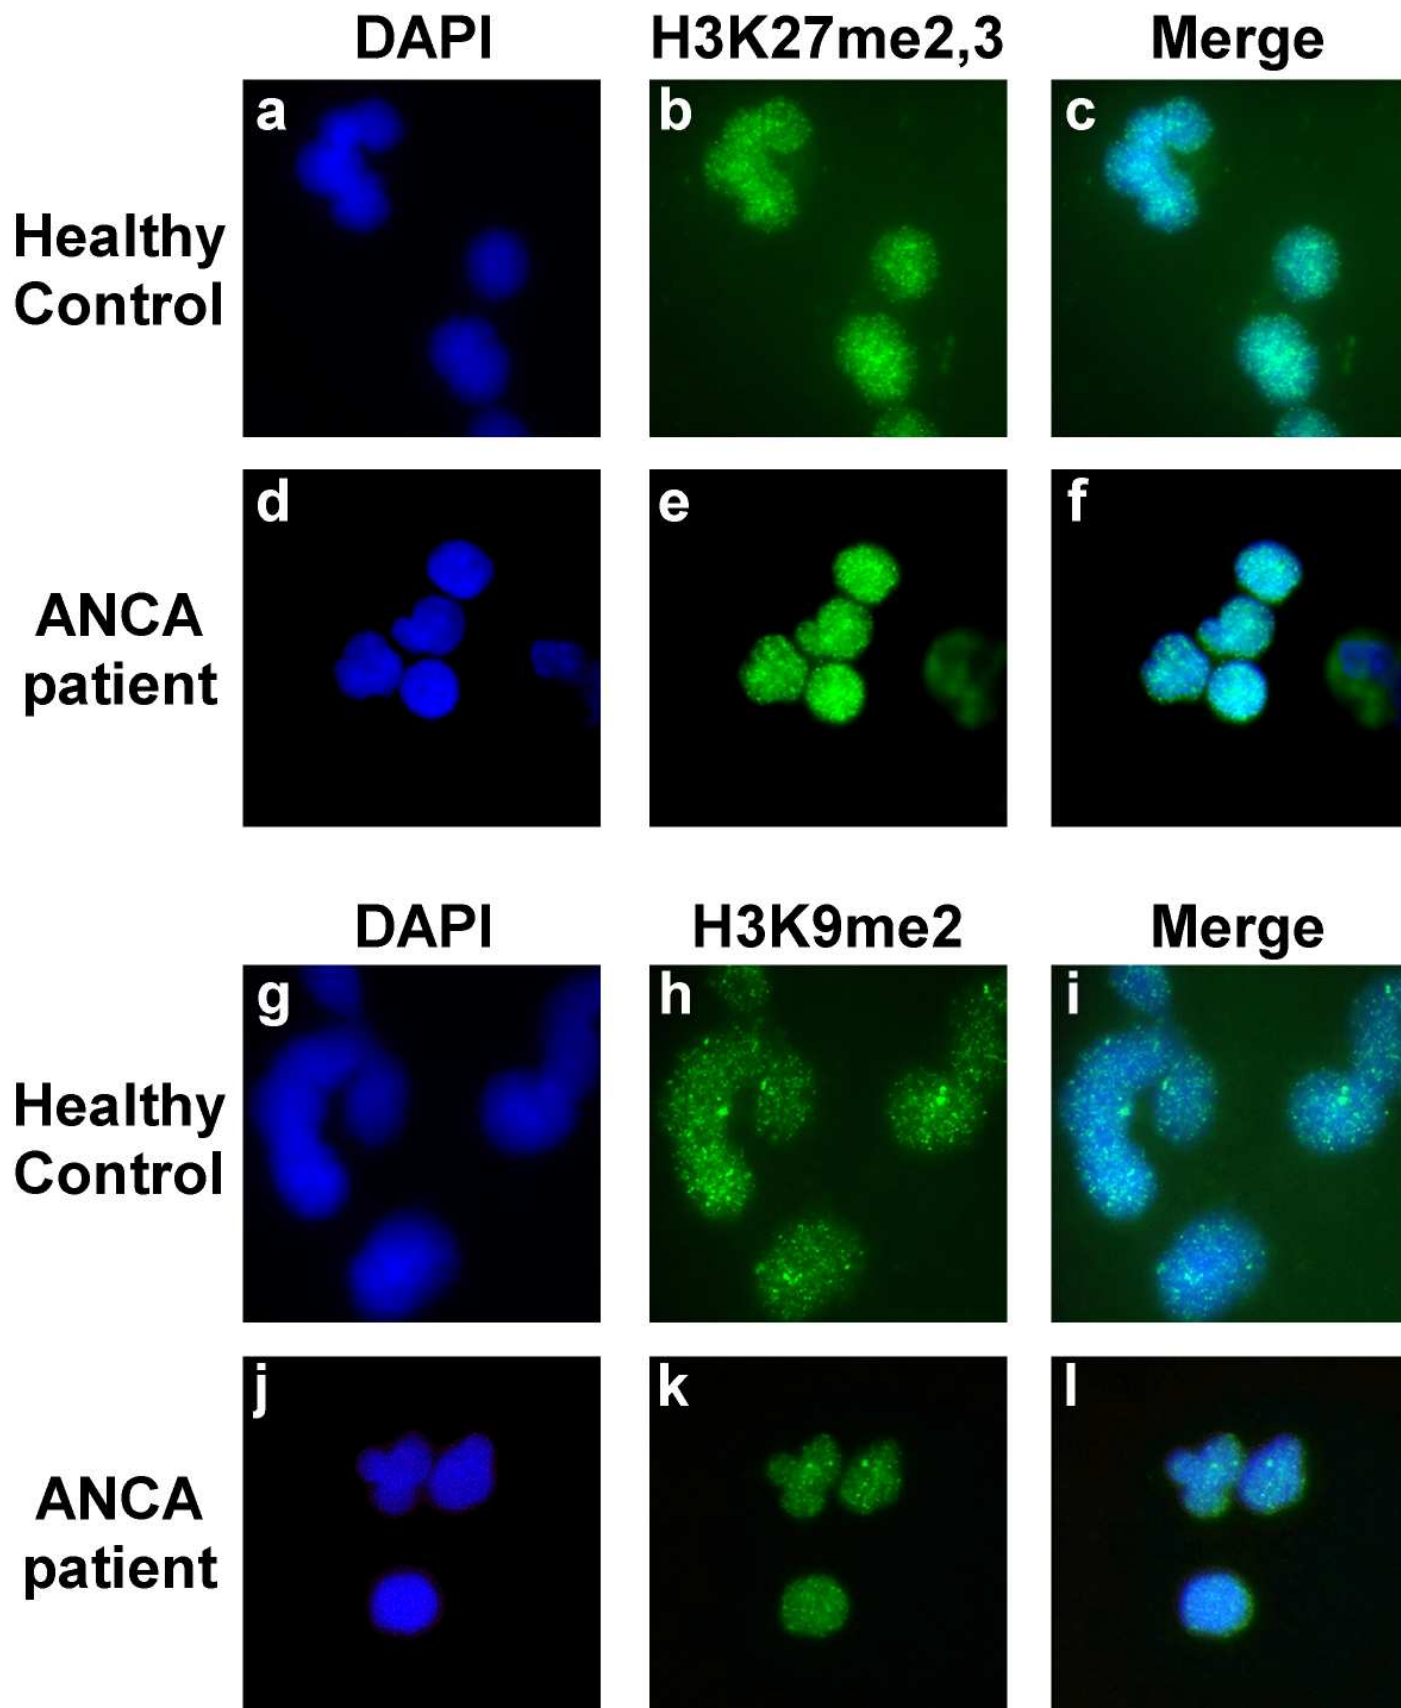

## Supplementary figure 2

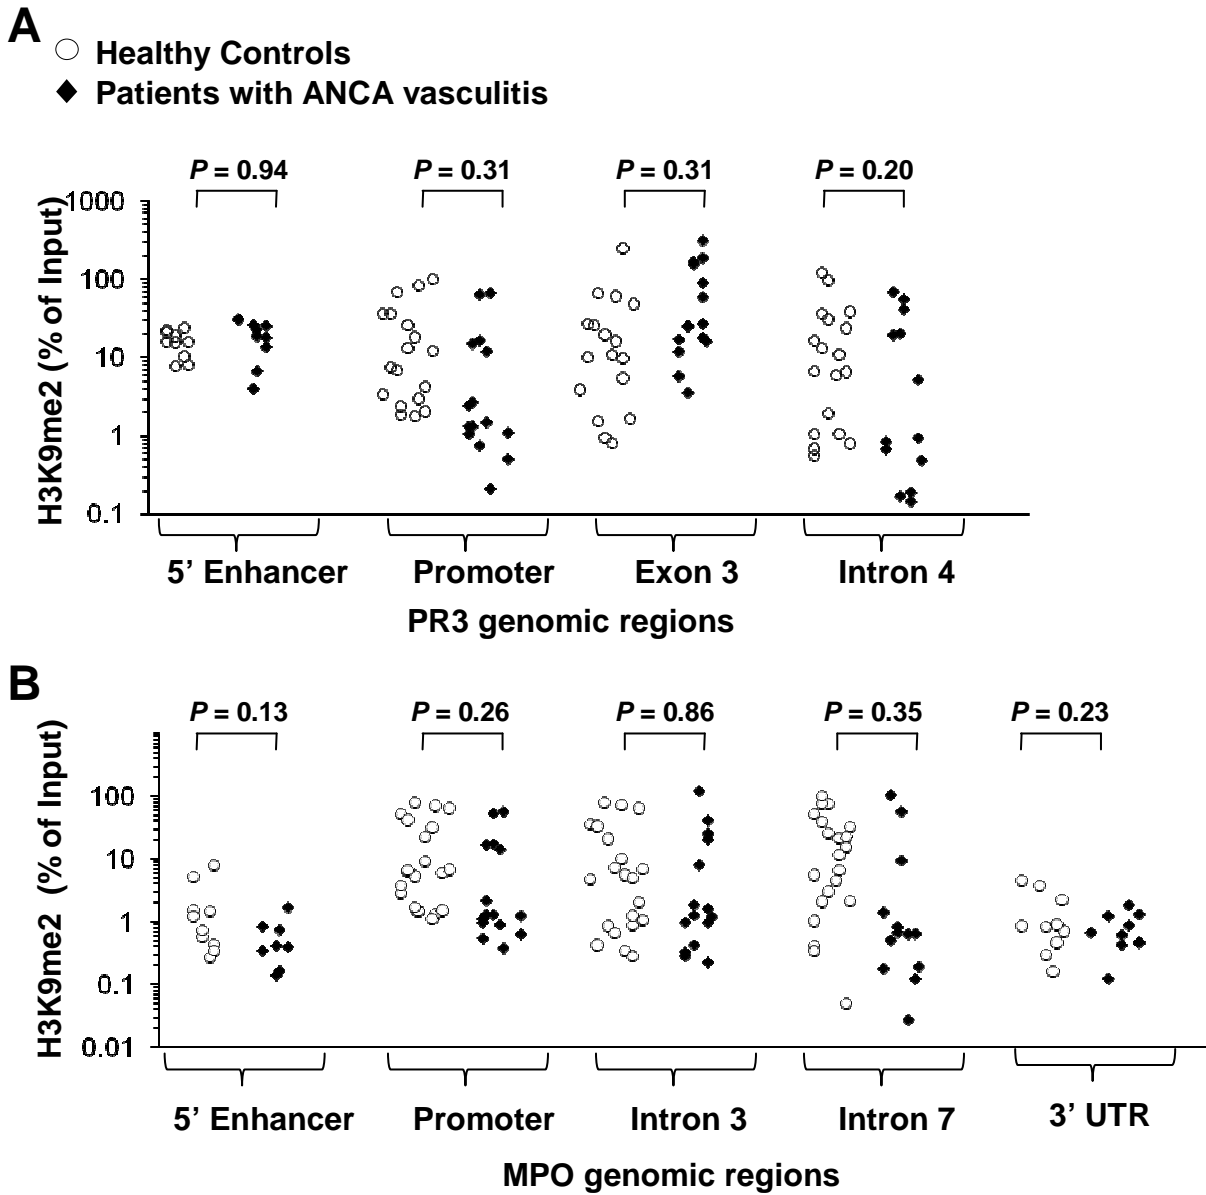

# Supplementary figure 3

## A

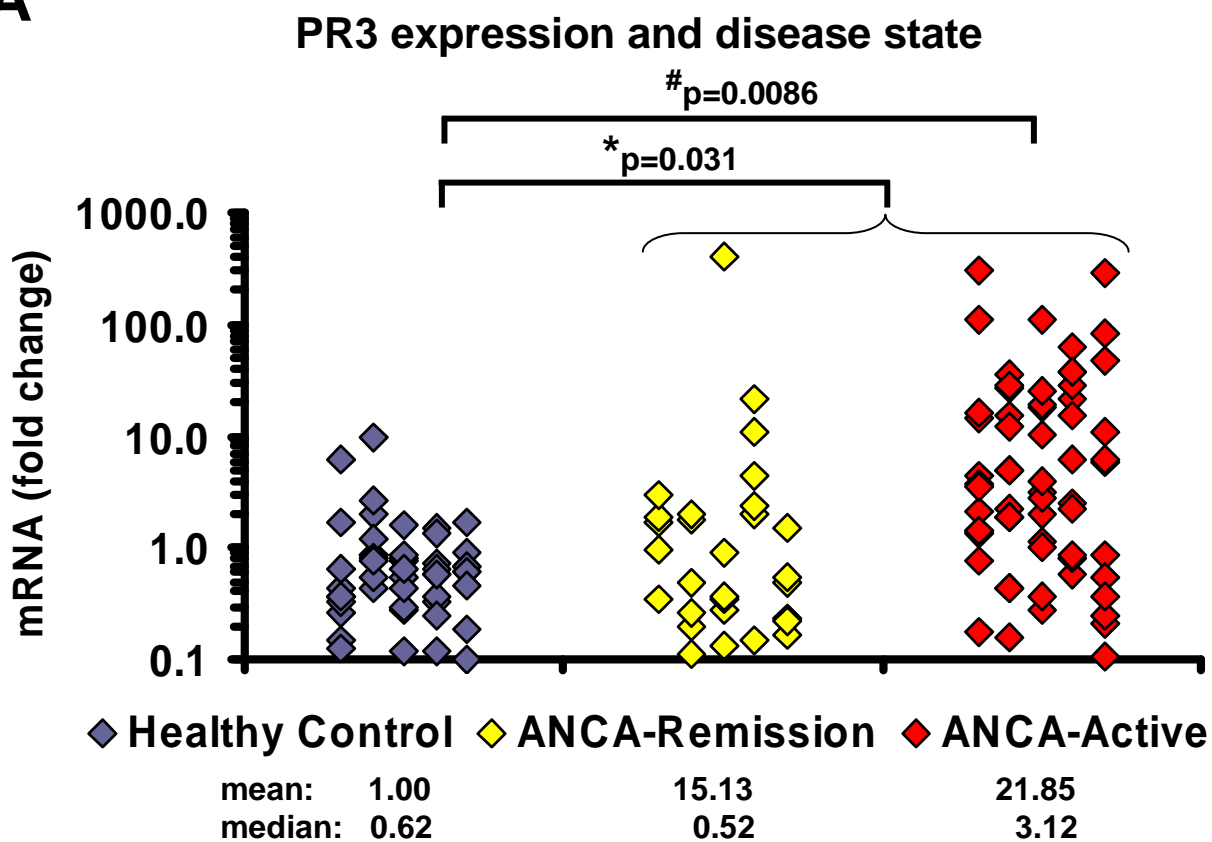

## B

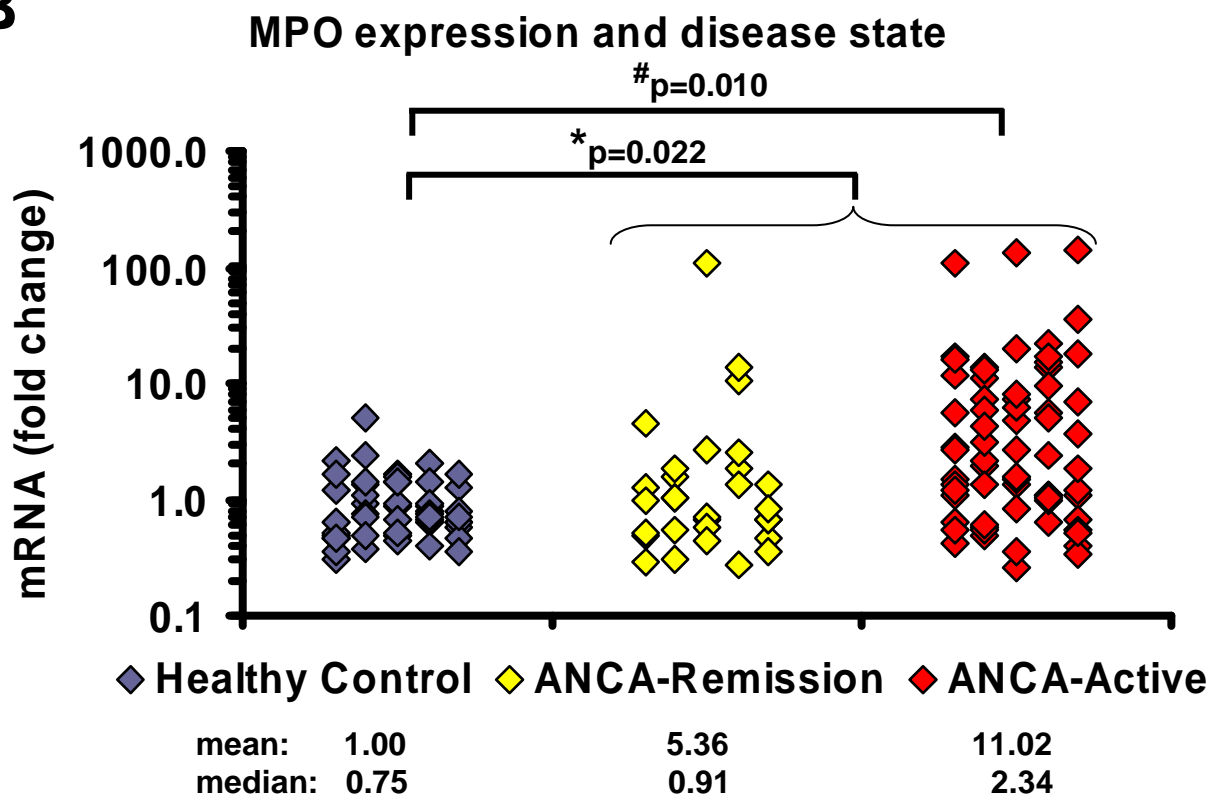



## Supplementary figure 3 (continued)

### C

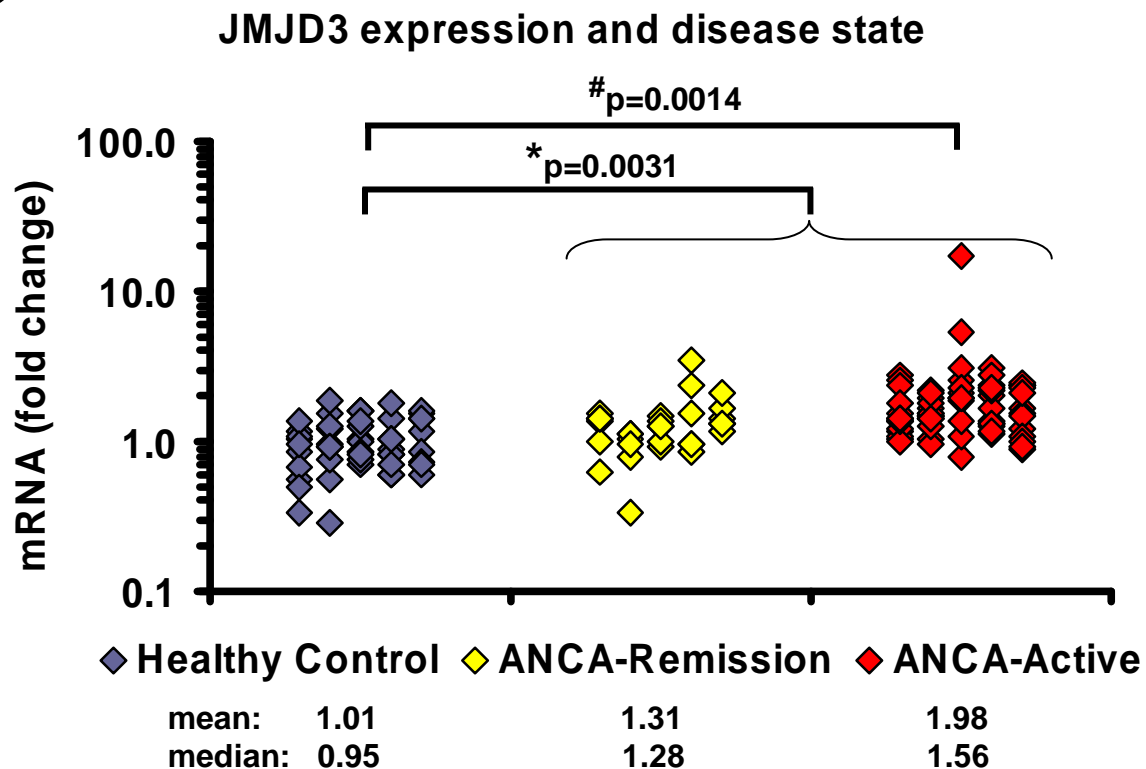

### D

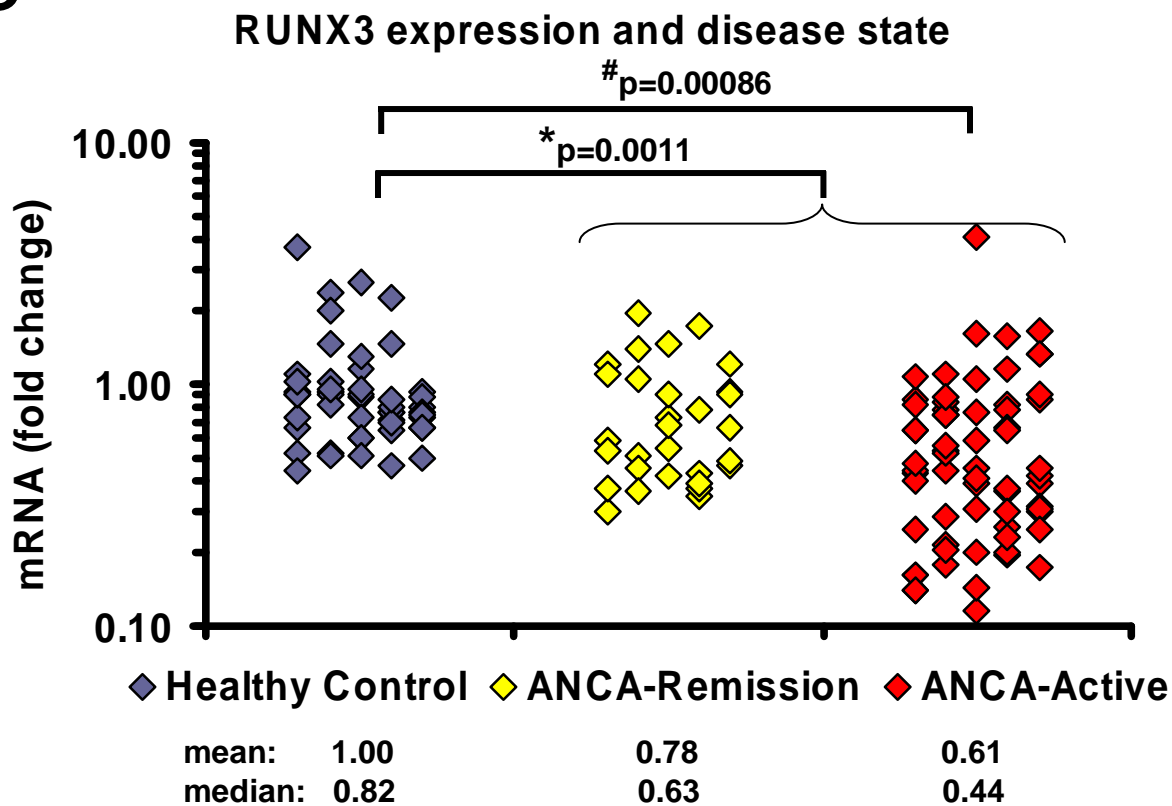

# Supplementary figure 4

## A

### Methylated PR3 specific PCR

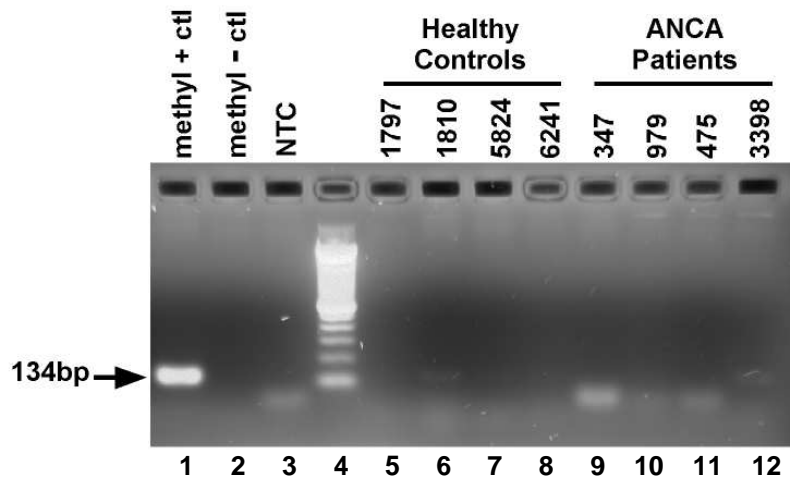

### Unmethylated PR3 specific PCR

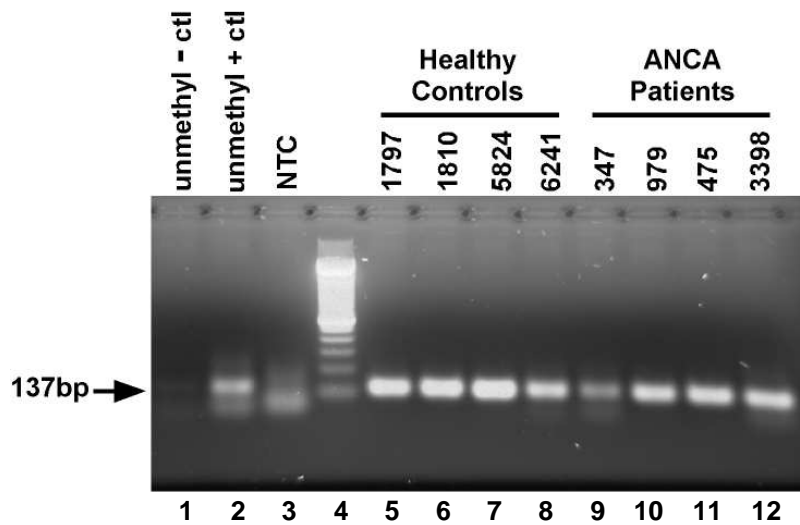

## B

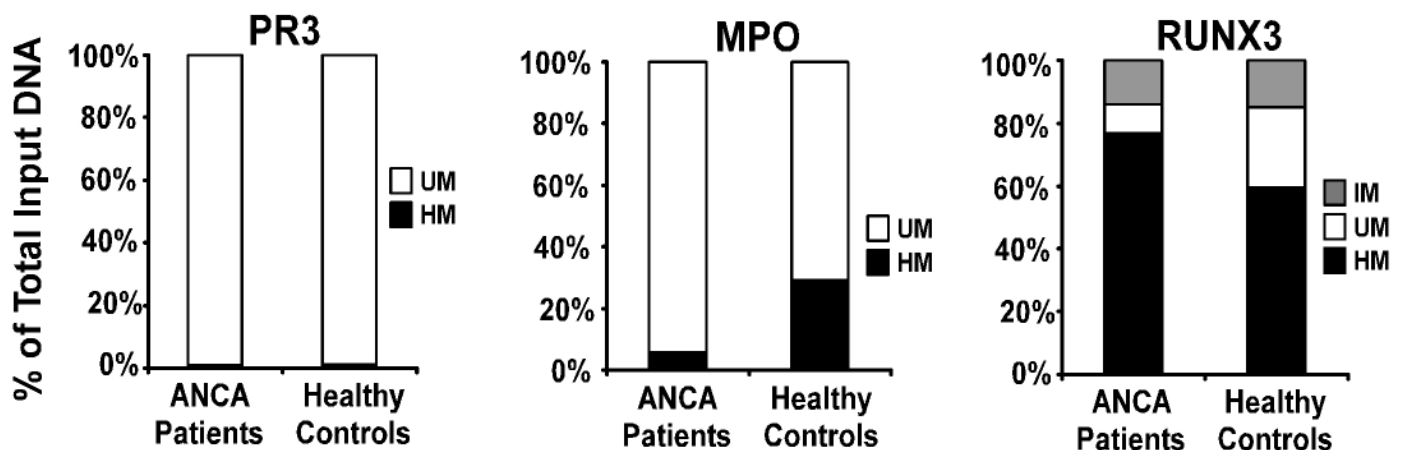

## Supplementary figure 5

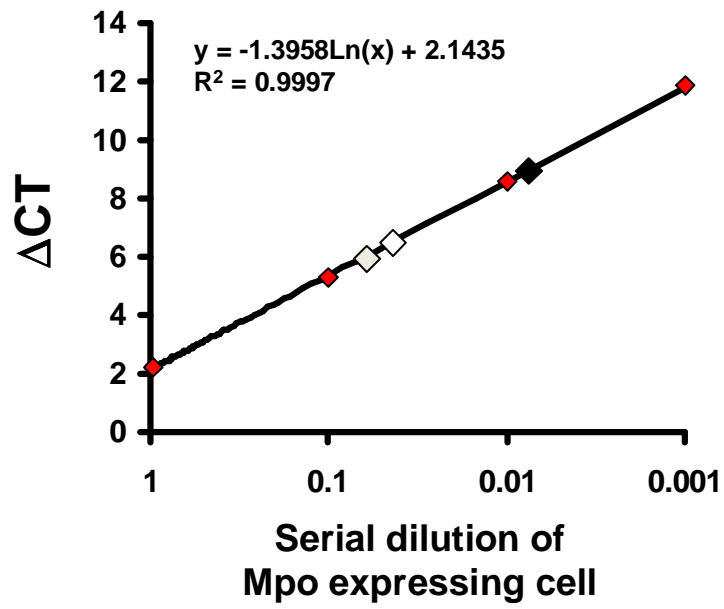

**Supplementary Table 1.**

**Characteristics of patients with ANCA disease enrolled in the epigenetics study**

| <i>H3K27me3</i><br>level | Patient  | Diagnosis | Age | Sex | Race  | Disease<br>Status | ANCA Titer |       | Scr<br>mg/dl | Therapy           |
|--------------------------|----------|-----------|-----|-----|-------|-------------------|------------|-------|--------------|-------------------|
|                          |          |           |     |     |       |                   | PR3        | MPO   |              |                   |
| Normal                   | ANCA 1   | WG        | 40  | M   | other | Remission         | 2.8        | 23.7  | 0.8          | CS                |
| Normal                   | ANCA 2   | WG        | 32  | M   | W     | Remission         | 89.7       | 2.5   | 1.2          | CS,CP,Rituxan     |
| Normal                   | ANCA 3   | WG        | 43  | F   | W     | Remission         | 11.8       | 1.3   | 0.8          | CS,PLEX,HD,MMF    |
| Normal                   | ANCA 4   | MPA       | 49  | F   | W     | Remission         | 95.9       | 3     | 0.8          | CS,AZA            |
| Normal                   | *ANCA 5  | WG        | 19  | F   | W     | Active            | 91.3       | 3     | 1.5          | CS,CP             |
| Low                      | ANCA 6   | WG        | 63  | F   | AA    | Active            | 6.8        | 34.1  | 2.2          | CS,PLEX,HD        |
| Low                      | ANCA 7   | WG        | 51  | M   | W     | Active            | 65.3       | 3.5   | 1.5          | CS,CP             |
| Low                      | ANCA 8   | WG        | 63  | M   | W     | Active            | 2.3        | 22.7  | 2.2          | CS,CP,AZA         |
| Low                      | ANCA 9   | MPA       | 83  | F   | other | Active            | 2.3        | 60.1  | 1.7          | CS,CP             |
| Low                      | ANCA 10  | WG        | 59  | M   | W     | Active            | 29.7       | 2.4   | 2.9          | CS,MMF            |
| Low                      | ANCA 11  | WG        | 49  | M   | W     | Active            | 106.6      | 2.5   | 7.1          | CS,MMF            |
| Low                      | ANCA 12  | MPA       | 72  | M   | W     | Active            | 3.8        | 122.7 | 2.8          | (-)               |
| Low                      | ANCA 13  | WG        | 59  | M   | W     | Active            | 2.9        | 75.9  | 0.8          | CS,CP,PLEX        |
| Low                      | ANCA 14  | MPA       | 28  | M   | W     | Active            | 136.6      | 4.2   | 5.0          | CS,CP,MMF,Rituxan |
| Low                      | §ANCA 15 | MPA       | 31  | F   | W     | Remission         | 2.8        | 69.4  | 1.7          | (-)               |

\*Based on active disease status, this patient would be predicted to have low levels of H3K27me3

§ Based on remission disease status, this patient would be predicted to have normal levels of H3K27me3.

CS, corticosteroids; CP, cyclophosphamide; MMF, mycophenolate mofetil; AZA, azathioprine; PLEX, plasma exchange; HD, hemodialysis

**Supplementary Table 2.**  
**Demographics of subject populations**

| Analytical method | <i>Healthy Controls</i> |             |              | <i>ANCA Patients</i> |             |              |
|-------------------|-------------------------|-------------|--------------|----------------------|-------------|--------------|
|                   | Affy® array             | TaqMan® PCR | Chromatin IP | Affy® array          | TaqMan® PCR | Chromatin IP |
| Unique donors (n) | 16                      | 49          | 23           | 21                   | 69          | 15           |
| Samples (n)       | 16                      | 49          | 23           | 25                   | 97          | 15           |
| Sex (% male)      | 61                      | 51          | 48           | 55                   | 52          | 64           |
| Race (% W/AA)*    | 82/4                    | 74/18       | 74/0         | 82/18                | 81/15       | 77/9         |
| Age (years)       | 29±7                    | 42±17       | 33±14        | 48±19                | 50±17       | 47±17        |
| BVAS‡             | NA§                     | NA          | NA           | 10.4±8.0             | 6.7±7.4     | 9.6±8.6      |

\*W/AA: Caucasian/African American

‡BVAS: Birmingham Vasculitis Activity Score

§NA: not applicable

### Supplementary Table 3.

#### RNA Primers (Integrated DNA Technologies, INC. Coralville, IA, USA)

|                           |                                           |                                                                                                                     |
|---------------------------|-------------------------------------------|---------------------------------------------------------------------------------------------------------------------|
| PR3                       | Forward Primer<br>Reverse Primer<br>Probe | 5'-TGT CAC CGT GGT CAC CTT CTT-3'<br>5'-CCC CAG ATC ACG AAG GAG TCT AT-3'<br>FAM-TTG CAC TTT CGT CCC TCG CCG-TAMRA  |
| PR3                       | Forward Primer 394<br>Reverse Primer 624  | 5'-CTG AGC AGC CCA GCC AAC CT-3'<br>5'-GAA GCA GAT GCC GGC CTT GC-3'                                                |
| MPO                       | Forward Primer<br>Reverse Primer<br>Probe | 5'-CCA GGA AGC CCG GAA GAT-3'<br>5'-CGG AAG GCA TTG GTG AAG A-3'<br>FAM-TGC CCA CGT ACC GTT CCT ACA ATG ACT C-TAMRA |
| mMpo                      | Forward Primer<br>Reverse Primer          | 5'-CCA GGC GGC CCG GAA GAT-3'<br>5'- TTG GTG AAG ACA TTG GCG AT-3'                                                  |
| RUNX3 3'UTR               | Forward Primer<br>Reverse Primer          | 5'-CAG AGA AGA TGA GTC TAT GGC ATC A-3'<br>5'-GAT GCG TTG AGC TGG TAA AGT G-3'                                      |
| RUNX3 ex4/5<br>(U937/P44) | Forward Primer<br>Reverse Primer          | 5'-CAG CAC CAC AAG CCA CTT CA-3'<br>5'-GGT CGG AGA ATG GGT TCA GTT-3'                                               |
| JMJD3                     | Forward Primer<br>Reverse Primer          | 5'-GTG ACC TTA GAG AGA GCA GAG TTC AG-3'<br>5'-CAC GCA GGC GGT GGT T-3'                                             |
| Cox 5B                    | Forward Primer<br>Reverse Primer<br>Probe | 5'-TGG CAT CTG GAG GTG TT-3'<br>5'-GTC CAG TCC CTT CTT TGC AGC-3'<br>FAM-TGA TGA AGA GCA GGC GAC TGG GTT G-MGB      |

## Supplementary Table 4.

### ChIP Primers (Integrated DNA Technologies, INC. Coralville, IA, USA)

|            |                                  |                                                                                    |
|------------|----------------------------------|------------------------------------------------------------------------------------|
| hPR3 5'enh | Forward Primer<br>Reverse Primer | 5'-TGA GAT GGA GTC TTG CTC TGT TG-3'<br>5'-GGT TGC AGG GAG CCA AGA T-3'            |
| hPR3 prm   | Forward Primer<br>Reverse Primer | 5'-CCA AGG CAA AAG GAG GAA GTG-3'<br>5'-CAA GCT CCT CTT ATA GCC CAA TG-3'          |
| hPR3 ex3   | Forward Primer<br>Reverse Primer | 5'-CCC ACC CAG CAG CAC TTC-3'<br>5'-CCG CGT CGT AGT TGT TCA GA-3'                  |
| hPR3 in4   | Forward Primer<br>Reverse Primer | 5'-CCC CCA CTC CCC TCT AGG A-3'<br>5'-CTC CGT CTC AAA AAC AAA CAA AAA G-3'         |
| hPR3 3'UTR | Forward Primer<br>Reverse Primer | 5'-TCT CGG CTC ACT GCA ACC T-3'<br>5'-GGA GAC TGA GGC AGG AGA ATT G-3'             |
| hMPO 5'enh | Forward Primer<br>Reverse Primer | 5'-GGG ACT GGC GGG TAA CTC A-3'<br>5'-CAA GGG AGT GGG AGG GAT TT-3'                |
| MPO prm    | Forward Primer<br>Reverse Primer | 5'-CAC CCC CAG CTT AGA GGA CAT-3'<br>5'-TCA CCT GAT ATT GTC AGC TCC TCT T-3'       |
| hMPO in3   | Forward Primer<br>Reverse Primer | 5'-AGA CCT GCT GGA GAG GAA GCT<br>5'-GCA ACA GTA CCA GTG ACA TTG AAT G-3'          |
| MPO in7    | Forward Primer<br>Reverse Primer | 5'-TCT GGA AGA CAA GAG AGT CAA ATC C-3'<br>5'-CAC CGC TAG AAA CTG GGT TTA TTT A-3' |
| hMPO 3'UTR | Forward Primer<br>Reverse Primer | 5'-CCT CAC CCT GAT TTC TTG CTT ATT-3'<br>5'-GGG CAA CAG GCC CAG TT-3'              |
| MYO-D      | Forward Primer<br>Reverse Primer | 5'-CCG CCT GAG CAA AGT AAA TGA-3'<br>5'-GGC AAC CGC TGG TTT GG-3'                  |

### RNA polymerase II Immunoprecipitation Primers

|        |                                           |                                                                                                                     |
|--------|-------------------------------------------|---------------------------------------------------------------------------------------------------------------------|
| PR3    | Forward Primer 336<br>Reverse Primer 624  | 5'-GGT GTT TCT GAA CAA CTA CGA C-3'<br>5'-GAA GCA GAT GCC GGC CTT GC-3'                                             |
| MPO    | Forward Primer<br>Reverse Primer<br>Probe | 5'-CCA GGA AGC CCG GAA GAT-3'<br>5'-CGG AAG GCA TTG GTG AAG A-3'<br>FAM-TGC CCA CGT ACC GTT CCT ACA ATG ACT C-TAMRA |
| Cox 5B | Forward Primer<br>Reverse Primer<br>Probe | 5'-TGG CAT CTG GAG GTG TT-3'<br>5'-GTC CAG TCC CTT CTT TGC AGC-3'<br>FAM-TGA TGA AGA GCA GGC GAC TGG GTT G-MGB      |

### Methyl specific PCR Primers

|     |                                                                                                              |                                                                                                                                                                      |
|-----|--------------------------------------------------------------------------------------------------------------|----------------------------------------------------------------------------------------------------------------------------------------------------------------------|
| PR3 | Methyl Forward Primer<br>Unmodified Forward Target<br>Methyl Reverse Primer<br>Unmodified Reverse Target     | 5'-GAT TTT AGC GTT TGG TGA AC-3'<br>5'-GAC CCC AGC GCC TGG TGA AC-3'<br>5'-AAA AAC GTC GTT CAA TTT ATT CT-3'<br>5'-GAG AAC GTC GTT CAG TTT GTT CT-3'                 |
|     | Unmethyl Forward Primer<br>Unmodified Forward Target<br>Unmethyl Reverse Primer<br>Unmodified Reverse Target | 5'-GTA GAT TTT AGT GTT TGG TGA AT-3'<br>5'-GTA GAC CCC AGC GCC TGG TGA AC-3'<br>5'-AAA AAA CAT CAT TCA ATT TAT TCT CC-3'<br>5'-GGA GAA CGT CGT TCA GTT TGT TCT CC-3' |
